# Supplementary material
Source: Springer Nature journal article supplement (https://www.springermedizin.de/resource/supplementary/12875_2014_1088_MOESM2_ESM.pdf/9435792)

# My knowledge about home remedies comes from...

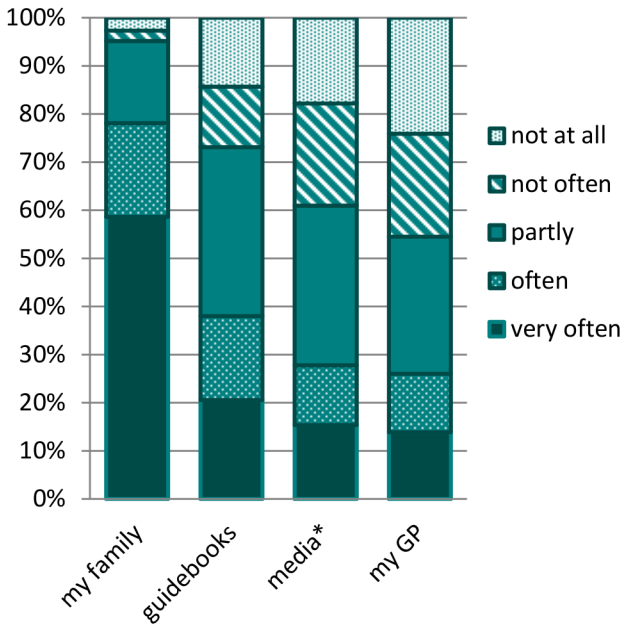

Supplement: MOESM2 [file 9435792]
